# Supplementary material
Source: PubMed Central journal article supplement (PMC3013026)

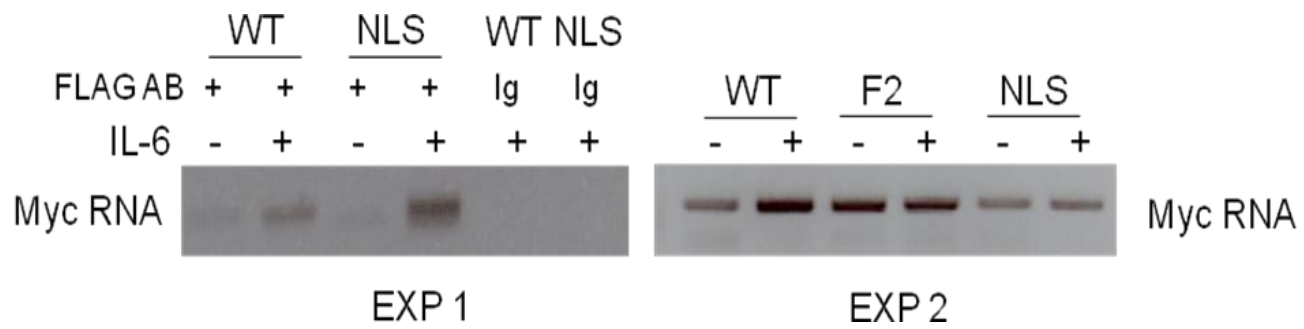

Supplement: supp_M110.153221_jbc.M110.153221-1.pdf [file supp_M110.153221_jbc.M110.153221-1.pdf]
